# Supplementary material for: Integrated Machine Learning Decision Tree Model for Risk Evaluation in Patients with Non-Valvular Atrial Fibrillation When Taking Different Doses of Dabigatran
Source: MDPI journal article supplement (doi:10.3390/ijerph20032359), 2023-01-29
Supplement: s1 [file s1]

**Supplementary Table S1.** Predictive variables (X1-X17), two target variables (P1, P2), and their descriptions in this study.

|     | <b>Variables</b>                                                  | <b>Description</b>                                                                                | <b>Units</b>              |
|-----|-------------------------------------------------------------------|---------------------------------------------------------------------------------------------------|---------------------------|
| X1  | Gender                                                            | 1: Male; 2: Female                                                                                | -                         |
| X2  | Age                                                               | 1: <65; 2: ≥65 & <75; 3: ≥75                                                                      | year-old                  |
| X3  | BMI                                                               | 1: <18.5; 2: ≥18.5 & <30; 3: ≥30                                                                  | kg/m <sup>2</sup>         |
| X4  | Body weight                                                       | 1: <60; 2: ≥60                                                                                    | kg                        |
| X5  | Ethnicity                                                         | 1: Arab/others; 2: European                                                                       | -                         |
| X6  | Hypertension history                                              | 1: Record of hypertension required medical treatment; 2: No                                       | -                         |
| X7  | Kidney function (GFR)                                             | 1: <30; 2: ≥30 & <50; 3: ≥50                                                                      | ml/min/1.73m <sup>2</sup> |
| X8  | Previous stroke history                                           | 1: History of stroke or TIA; 2: No                                                                | -                         |
| X9  | Previous bleeding history                                         | 1: History of bleeding; 2: No                                                                     | -                         |
| X10 | Concomitant use of drug                                           | 1: Concomitant use of verapamil, diltiazem, anti-thrombotic agent, NSAID, or COX inhibitor; 2: No | -                         |
| X11 | History of MI                                                     | 1: History of MI; 2: No                                                                           | -                         |
| X12 | History of DM                                                     | 1: History of DM; 2: No                                                                           | -                         |
| X13 | History of CHF                                                    | 1: Medical history of CHF or heart echo revealed ejection fraction <40%; 2: No                    | -                         |
| X14 | Smoking                                                           | 1: Never; 2: Current smoker; 3: Former history                                                    | -                         |
| X15 | History of systemic embolism*                                     | 1: History of systemic embolism; 2: no                                                            | -                         |
| X16 | Liver function abnormality*                                       | 1: Present of liver function abnormality; 2: No                                                   | -                         |
| X17 | Anemia                                                            | 1: Hemoglobin ≥10; 2: <10                                                                         | gm/dl                     |
| P1  | Vascular events in dabigatran 110mg subgroup*                     | 1: No vascular event happened within the first year of follow-up; 2: Yes                          | -                         |
| P2  | Bleeding (Major and minor bleeding) in dabigatran 150mg subgroup* | 1: No bleeding event happened within the first year of follow-up; 2: Yes                          | -                         |

\* BMI: body mass index, GFR: glomerular filtration rate, TIA: transient ischemic attack, NSAID: non-steroidal anti-inflammatory drug, COX: cyclooxygenase, MI: myocardial infarction, DM: diabetes mellitus CHF: congestive heart failure.

\* Liver function abnormality defined as medical history of cirrhosis or abnormal biochemical data when the patients were enrolled (Bilirubin more than 2 times the upper limit of normal, plus 1 or more of aspartate transaminase, alanine transaminase, or alkaline phosphatase more than 3 times the upper limit of normal).

\* Vascular events defined as Stroke, systemic embolism and vascular death.

\* Major bleeding was defined as a drop in hemoglobin of  $\geq 2$  gm/dl (1.2 mmol/l), transfusion of  $\geq 2$  packed cells, or symptomatic bleeding in a critical area or organ. Critical areas were intraocular, intracranial (including hemorrhagic stroke), intraspinal, intramuscular with compartment syndrome, retroperitoneal, intra-articular, or pericardial. All other bleeding was considered minor bleeding.
